# Supplementary material
Source: publisher figshare collection journal article supplement (https://plos.figshare.com/articles/dataset/_/3082492)
Supplement: Supplementary file [file 1]

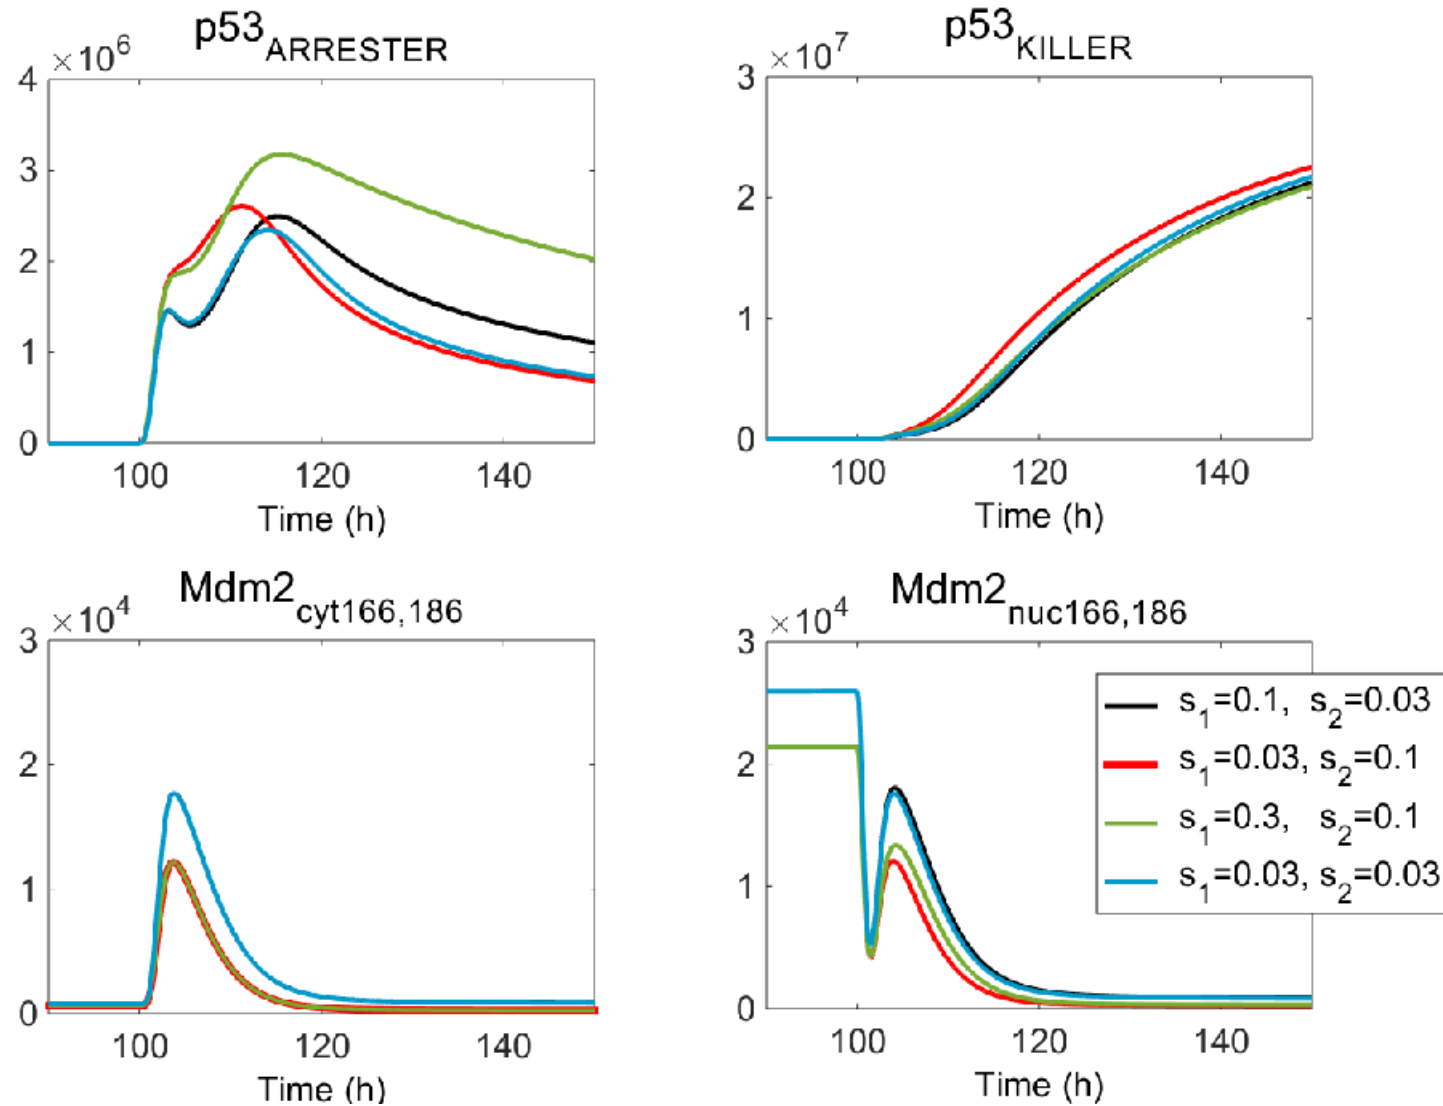

**S2 Figure: The negative feedback mediated by Wip1 is required for generating oscillations.** Trajectories for p53 and Mdm2 were simulated using the model variant in which there is no Wip1-mediated dephosphorylation of ATM. Simulations were performed for four different pairs of Wip1 ( $s_1$ ) and PTEN ( $s_2$ ) synthesis rates, with IR dose equal 3 Gy. Black line corresponds to nominal values of  $s_1$  and  $s_2$ .
